# Supplementary material
Source: publisher site journal article supplement (https://www.dovepress.com/article/356326)
Supplement: Supplementary file 1 [file get_supplementary_file.php]

Supplementary Material

## Supplementary Table 1

| Antibodies and Reagents | Manufacturer, Country, Batch number | Concentration |
| --- | --- | --- |
| Roswell Park Memorial Institute 1640 (RPMI-1640) | Gibco, USA, Lot: 8121248 | - |
| Dulbecco’s modified Eagle’s medium (DMEM) | Gibco, USA, Lot: 8121032 | - |
| Fetal bovine serum (FBS) | Gibco, USA, Lot: 42F1376K | - |
| Penicillin/streptomycin | Gibco, USA, Lot: 2321125 |  |
| GMyc-PCR Mycoplasma Test Kit | YEASEN, China, Lot: G5110070 |  |
| Plasmid vectors for *DNTTIP2* | GeneChem, China, Lot: GIEE0304606 |  |
| Puromycin | Beyotime Biotechnology, China, Lot: 041321210517 | 1.5 μg/mL |
| Lipofectamine 3000 | Invitrogen, USA, Lot: 2395298 | - |
| Opti-MEM | Gibco, USA, Lot: 2276923 | - |
| Anti-DNTTIP2 Antibody | ABclonal, China, Lot: A16120 | WB: 1:1000 |
| Anti-β-actin Antibody | Invitrogen, USA, Lot: RI2265993 | WB: 1:5000 |
| Matrigel Matrix basement membrane | Corning, USA, Lot:1074003 | - |
| 0.2% TritonX-100 | Proteintech, China, Lot: 61202011 | - |
| Nuclei were stained using 4',6-diamidino-2-phenylindole (DAPI) | Beyotime Biotechnology, China, Lot: 091620210520 | - |
| phorbol 12-myristate 13-acetate (PMA) | Sigma-Aldrich, USA, Lot: SLBX8899 | 10 ng/mL |
| anti-CD163 polyclonal antibodies | Proteintech, China, Lot: 00091171 | 1:1000 |
| anti-CD206 polyclonal antibodies | Proteintech, China, Lot: 00089604 | 1:1000 |
| Calcein-acetoxymethyl ester (calcein-AM) | Solarbio LIFE SCIENCES, China, Lot: 20210810 | - |
| Alexa Fluor 488 AffiniPure goat anti-mouse IgG (H+L) | FcMACS, China, Lot: 136908 | 1:2000 |
| Goat anti-mouse IgG (H+L) CoraLite594 | Proteintech, China, Lot: 20000154 | 1:1000 |
| Goat anti-rabbit IgG (H+L) R-PE conjugate | Proteintech, China, Lot: 20000129 | 1:1000 |

# Methods

## DNTTIP2 RNAi and overexpression preparation

**Gene information:**

| **Gene symbol** | **GenBank_ID** |
| --- | --- |
| DNTTIP2 | NM_014597 |

**Target information:**

| **ID** | **Target Sequence information：** |
| --- | --- |
| DNTTIP2-RNAi(105940-1) | gcCGAAAGTAACTCCAACAAA |
| DNTTIP2-RNAi(105941-11) | ccTAAATAGCACAAAGGCTAA |
| DNTTIP2-RNAi(105942-1) | gcCAATGTTGAATCTCTTAAA |

**shRNA Sequence：**

| **ID** | **5’** | **stem** | **loop** | **stem** | **3’** |
| --- | --- | --- | --- | --- | --- |
| DNTTIP2-RNAi(105940-1)-a | Ccgg | gcCGAAAGTAACTCCAACAAA | CTCGAG | TTTGTTGGAGTTACTTTCGGC | TTTTTg |
| DNTTIP2-RNAi(105940-1)-b | aattcaaaaa | gcCGAAAGTAACTCCAACAAA | CTCGAG | TTTGTTGGAGTTACTTTCGGC |  |
| DNTTIP2-RNAi(105941-11)-a | Ccgg | ccTAAATAGCACAAAGGCTAA | CTCGAG | TTAGCCTTTGTGCTATTTAGG | TTTTTg |
| DNTTIP2-RNAi(105941-11)-b | aattcaaaaa | ccTAAATAGCACAAAGGCTAA | CTCGAG | TTAGCCTTTGTGCTATTTAGG |  |
| DNTTIP2-RNAi(105942-1)-a | Ccgg | gcCAATGTTGAATCTCTTAAA | CTCGAG | TTTAAGAGATTCAACATTGGC | TTTTTg |
| DNTTIP2-RNAi(105942-1)-b | aattcaaaaa | gcCAATGTTGAATCTCTTAAA | CTCGAG | TTTAAGAGATTCAACATTGGC |  |

**Plasmid name ：**GV493

**Element’s order：**hU6-MCS-CBh-gcGFP-IRES-puromycin

**Negative control number：**CON313

**
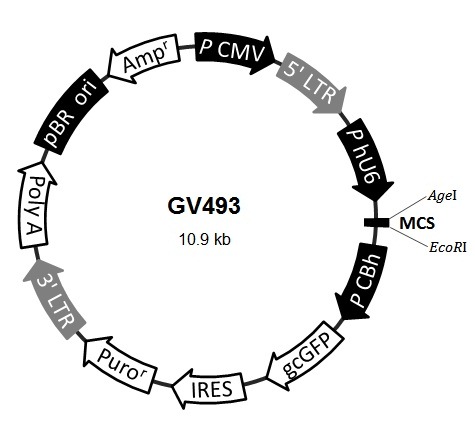
Negative control insert sequence：**TTCTCCGAACGTGTCACGT

**Overexpression Plasmid information：**

**Plasmid name：**GV657

**Element’s order**：CMV enhancer-MCS-3flag-polyA-EF1A-zsGreen-sv40-puromycin

**The cloning site:** BamHI / KpnI

**Control number：**CON468

**The positive clones sequencing results were analyzed**

**The comparison results were shown as follows：**

TGCAGAATTCCACCACACTGGACTAGTGGATCCCGCCACCATGGTGGTTACCAGATCTGCACGGGCTAAGGCCAGCATCCAAGCCGCGTCGGCTGAAAGTTCCGGGCAAAAGAGTTTTGCTGCTAATGGGATTCAAGCGCATCCAGAAAGTAGTACTGGATCTGATGCCCGAACTACTGCTGAATCACAGACCACTGGGAAGCAAAGTTTAATCCCTAGAACTCCTAAAGCTAGAAAGAGGAAGAGCAGAACTACAGGCTCACTACCAAAGGGGACTGAACCATCTACGGATGGAGAAACCTCTGAGGCAGAGTCAAATTATTCTGTGTCTGAGCACCATGATACCATTTTAAGGGTAACTAGGAGAAGGCAGATCTTAATTGCATGCTCCCCAGTGTCCAGTGTTAGGAAAAAGCCGAAAGTAACTCCAACAAAGGAGTCTTACACTGAAGAAATAGTGTCTGAAGCAGAATCTCATGTTTCAGGTATTTCTAGAATTGTGCTTCCTACAGAAAAAACTACAGGAGCCAGAAGAAGTAAGGCTAAATCTCTGACAGATCCAAGCCAAGAATCTCATACAGAAGCTATATCTGATGCTGAGACATCAAGCTCAGACATTTCATTCTCTGGAATTGCAACTAGAAGAACCAGGAGTATGCAGAGGAAATTAAAGGCACAAACTGAAAAGAAAGATAGTAAGATTGTACCAGGAAATGAGAAACAGATCGTGGGTACACCTGTGAATTCAGAGGATTCAGATACCAGACAAACTTCCCATTTACAAGCAAGATCTCTTTCTGAGATAAATAAGCCAAATTTCTATAATAATGACTTTGATGATGATTTCTCCCACAGAAGTTCAGAAAATATATTAACAGTGCACGAACAGGCCAATGTTGAATCTCTTAAAGAAACAAAACAGAATTGTAAGGATTTGGATGAAGATGCCAATGGAATAACAGATGAGGGGAAAGAAATTAATGAGAAAAGTTCTCAGCTGAAGAATCTTTCTGAACTTCAGGACACTAGCCTTCAACAGTTAGTTTCTCAGAGACATTCAACCCCCCAAAATAAAAATGCTGTATCAGTGCACTCTAATCTGAACTCTGAGGCTGTAATGAAATCATTAACTCAAACATTTGCAACTGTGGAAGTAGGCAGATGGAATAACAACAAAAAGAGCCCCATAAAAGCAAGTGACTTGACAAAGTTTGGTGATTGTGGTGGTAGTGATGATGAAGAAGAGTCCACAGTTATAAGTGTCAGTGAAGACATGAACAGTGAAGGGAATGTAGATTTTGAATGTGATACCAAACTATACACGTCTGCGCCCAACACATCTCAGGGTAAAGATAATTCTGTCTTACTAGTTCTCAGCAGTGATGAAAGCCAACAGTCTGAAAACAGTGAGAATGAAGAGGATACTTTATGTTTTGTTGAAAATAGTGGCCAAAGGGAGTCATTAAGTGGAGACACAGGAAGTCTGTCATGTGACAATGCATTGTTTGTAATTGACACAACTCCTGGAATGAGTGCTGATAAAAATTTTTACTTGGAAGAGGAAGACAAGGCAAGTGAGGTTGCCATTGAGGAAGAAAAAGAAGAGGAAGAGGATGAAAAAAGTGAAGAAGATTCATCAGACCATGACGAAAATGAAGATGAGTTTAGTGATGAAGAAGACTTCCTAAATAGCACAAAGGCTAAACTTCTGAAGTTGACAAGCAGCAGCATAGACCCTGGTCTGAGTATCAAGCAGTTGGGTGGTTTGTATATTAATTTTAATGCAGATAAACTACAGTCTAACAAGAGAACCCTAACACAGATCAAGGAGAAAAAGAAAAATGAGCTTCTGCAGAAAGCCGTCATTACACCTGATTTTGAAAAAAACCACTGTGTTCCACCATATAGTGAATCAAAGTATCAACTTCAGAAAAAACGCAGAAAAGAACGACAAAAAACAGCAGGGGATGGCTGGTTTGGTATGAAAGCTCCAGAAATGACAAATGAACTGAAAAATGATCTCAAAGCACTGAAGATGAGAGCCAGCATGGACCCGAAAAGATTTTACAAGAAAAATGATAGAGATGGCTTCCCCAAGTACTTCCAGATTGGAACCATTGTTGACAATCCAGCTGATTTCTACCATTCACGAATTCCCAAGAAGCAAAGGAAAAGAACTATTGTGGAAGAACTGCTGGCTGATTCTGAATTCAGAAGATACAACCGAAGGAAGTACTCAGAGATCATGGCTGAAAAAGCAGCAAATGCAGCAGGAAAAAAGTTCCGAAAGAAGAAGAAATTTCGCAATTCGGTACCAAGCTTAAGTGACTACAAGGATGACGATGACAAGGATTACAAAGACGACGATGATAAGGACTATAAGGATGATGACGACAAATCTAGATAGTTAATTAAACCGGTAATAAAATATCTTTATTTTCATTACATCTGTGTGTTGGTTTTTTGTGTGAATCGATAGTACTAACATACGCTCTCCATCAAAACAAAACGAAACAAAACAAACTAGCAAAATAGGCTGTCCCCAGTGCAAGT

**Colony-formation assay**

Five hundred cells were seeded in a 6-well plate and cultured for about 14 days. Colonies (>5 cells per colony) were stained with 0.5% crystal violet at room temperature (20-25°C) for 10 min and colony numbers were determined under compound light microscopy (Olympus BX53, Japan).

**Wound healing assay**

U251/GFP and U87MG/GFP cells were used in a wound-healing assay to measure migration ability. The cells were seeded in 6-well plates at a density of 4 × 105 cells per well and grown to confluence for 24 h in serum-free medium. After removal of the medium, the cell layer was scratched with a 10 μL pipette tip. Wound-healing was examined under an an inverted fluorescence microscope (Olympus CKX-41, Japan) (×200 magnification) after 12, 24, and 48 h.

**Transwell assay**

Fifty thousand cells in 200 μL of serum-free DMEM seeded in the upper chamber of the 24-well 8-µm Transwell chambers. 500 μl 10% FBS medium as a chemoattractant in the lower chamber. The Transwell chambers were coated with Matrigel. After 24 h of co-culture, the upper chambers of Transwell chambers were washed with 1% phosphate buffer (PBS), followed by fixation in 4% paraformaldehyde and a 15 min staining with 0.1% crystalline violet. The number of cells that had invaded the lower chambers was imaged using a light microscope (200x magnification, Olympus BX53, Japan) and measured using ImageJ.

**Immunofluorescence staining**

Cells were seeded on coverslips, fixed in chilled methanol for 10 min, and permeabilized with 0.1% Triton X-100 for 10 min at room temperature. After blocking (10% BSA in PBS), the coverslips were incubated with primary antibody overnight (4 °C), followed by incubation with the corresponding secondary antibodies. Nuclei were counterstained with DAPI (3 min in the dark) and the slides were washed in PBS and sealed with a solution containing a fluorescence quencher. Slides were examined and imaged under a fluorescence microscope. It was visualized with Olympus, BX60-32FB2-A03 upright epifluorescence microscopy (400x magnification) and two different kinds of Individual filters were used for capturing images using an Olympus, DP50 camera.

**Xenograft tumor model**

Animals were handled and received humane care followed with the Guide for the Care and Use of Laboratory Animals[1]. The animal experimental protocol (ethics number: 2021-10-029) was approved by the ethics committee of the Jiangsu Province Hospital of Chinese Medicine which conformed to the principles of animal protection, animal welfare and ethics. Four-week-old male BALB/c nude mice (15g -20 g) were employed (A total of 24 mice were randomly divided into 4 equal groups). They were obtained from the Beijing Institute of Biomedicine (Beijing, China) (Permission No. SYXK2019-0010) U251 cells transfected with sh-*DNTTIP2*, oe-*DNTTIP2*, as well as NC cells (1 × 107 cell/mouse) were injected subcutaneously into the right armpit region (n = 6 per group). The presence of tumors was visible after seven days. Tumor diameters (maximum and minimum) were measured twice a week. The mice were euthanized after 35 days and the sera and tumors were excised. Tumor volumes were calculated as V = 1/2ab2, and tumor growth curves were drawn.

**Phorbol-12-myristate 13-acetate (PMA) induction scheme selection**

The THP-1 cell line is a human leukemia cell-derived monocyte line capable of acquiring phenotypic and functional characteristics similar to those of the primary the macrophages upon PMA stimulation[2, 3]. It is currently the most widely used in vitro model of human-derived macrophages. It has been proven that 5 ng/mL PMA treatment can cause THP-1 monocytes to differentiate into macrophages[4]. In addition, it has been presumed by many researchers that the higher the PMA concentration makes it easier for the differentiated macrophages to transform into the M1 subtype. Therefore, a low-concentration induction protocol was chosen for this study. Due to various inter-laboratory variations, the initial induction with 5 ng/mL PMA for 48 h resulted in the adherence of only about 60% of the THP-1 cells to the wall. Since 95% of THP-1 cells differentiated and adhered to the wall under this treatment condition, subsequently, after many adjustments, 10 ng/mL for 48 h was selected as the induction model.

**Statistical analysis**

Data are expressed as means ± (SEM). Comparisons between two groups and multiple groups were assessed by t-tests and one-way analysis of variance (ANOVA), respectively. All data were analyzed with SPSS 29.0 (IBM Corp., Armonk, NY, USA) and illustrated using GraphPad Prism 8.0 (GraphPad Software, Inc., USA). All experiments were carried out thrice, independently. ****P < 0.0001, ***P < 0.001, **P < 0.01 and *P < 0.05 were defined to be statistically significant.

**Supplementary Figure**


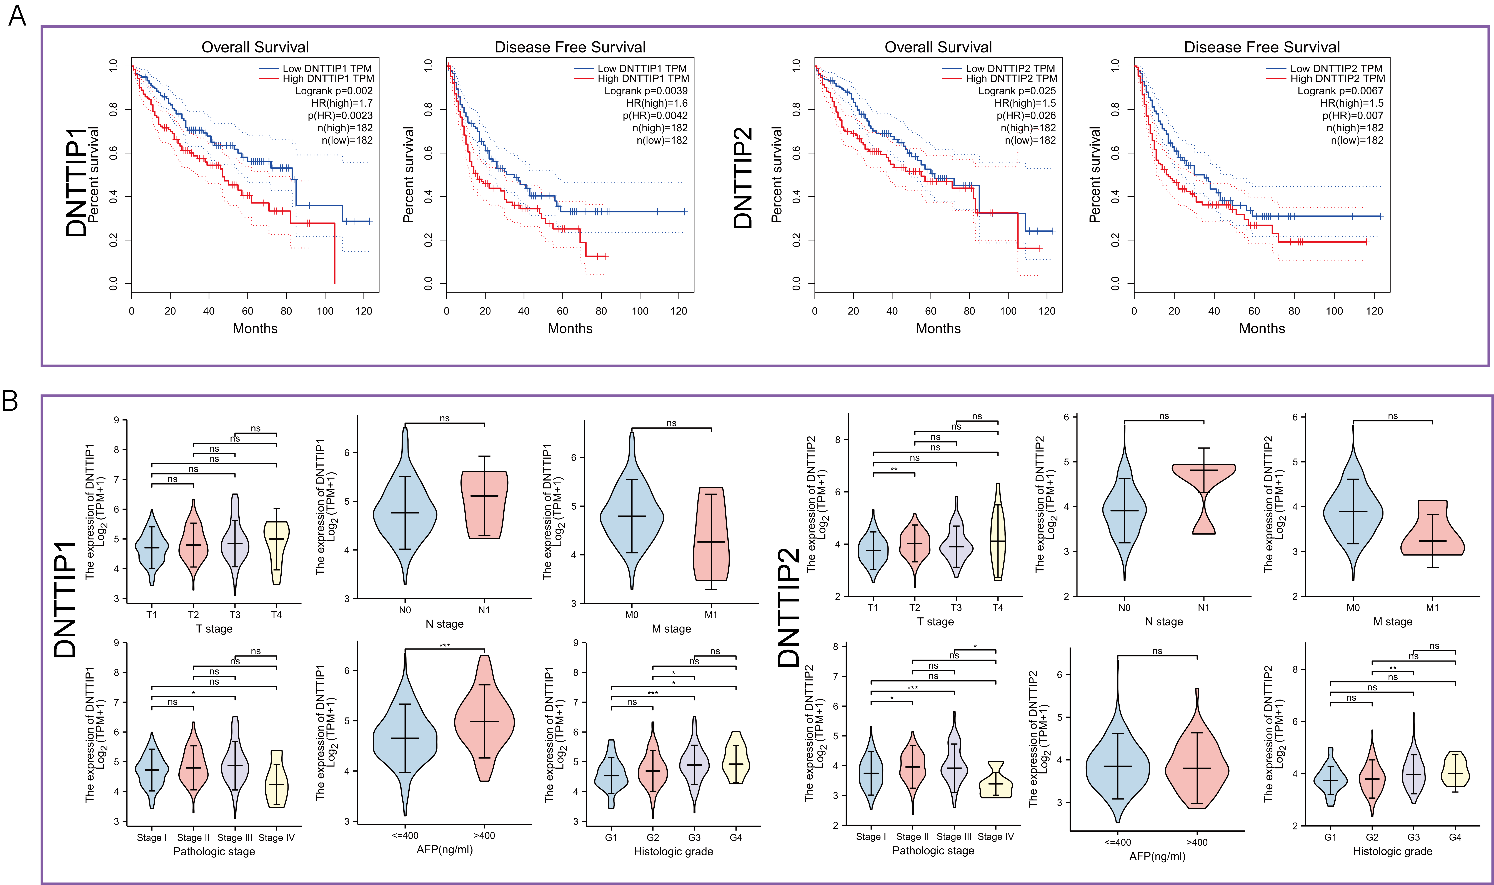


**Figure S1** (A) Kaplan-Meier survival analysis based on TCGA-Liver hepatocellular carcinoma (LIHC). (B)The relationship between DNTTIP1/2 expression status and clinicopathological characteristics in LIHC. NS: not significant, *P < 0.05, **P < 0.01, ***P < 0.001


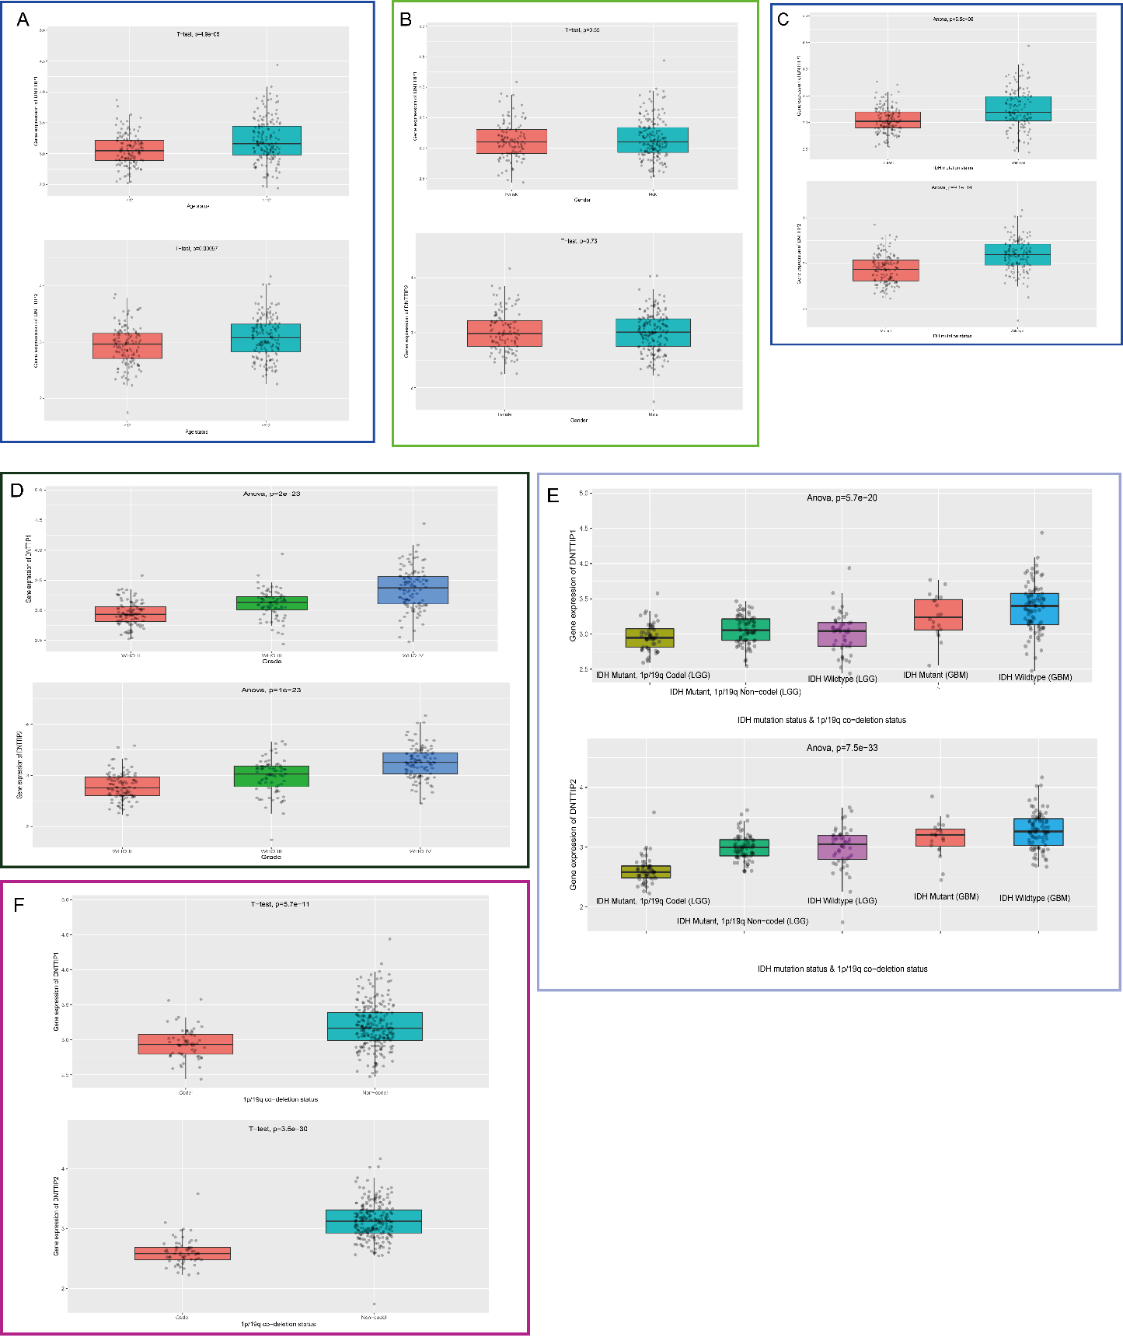


**Figure S2** DNTTIP1/2 expression in the different glioma subtypes based on Chinese Glioma Genome Atlas (CGGA) datasets.

(A) DNTTIP1/2 expression was correlated with patient age, (B) DNTTIP1/2 expression level was independent of gender, (C) Comparison of DNTTIP1/2 expression in IDH wild-type and mutant samples, (D) DNTTIP1/2 expression in gliomas of different grades (WHO II, III, and IV).(E) Comparison of DNTTIP1/2 expression in LGG, Glioblastoma (GBM), pathological criteria (WHO grade II and III), 1p19 co-deletion, isocitrate dehydrogenase (IDH) status, (F) Comparison of DNTTIP1/2 expression in the non-1p/19q and1p/19q co-deletion samples.


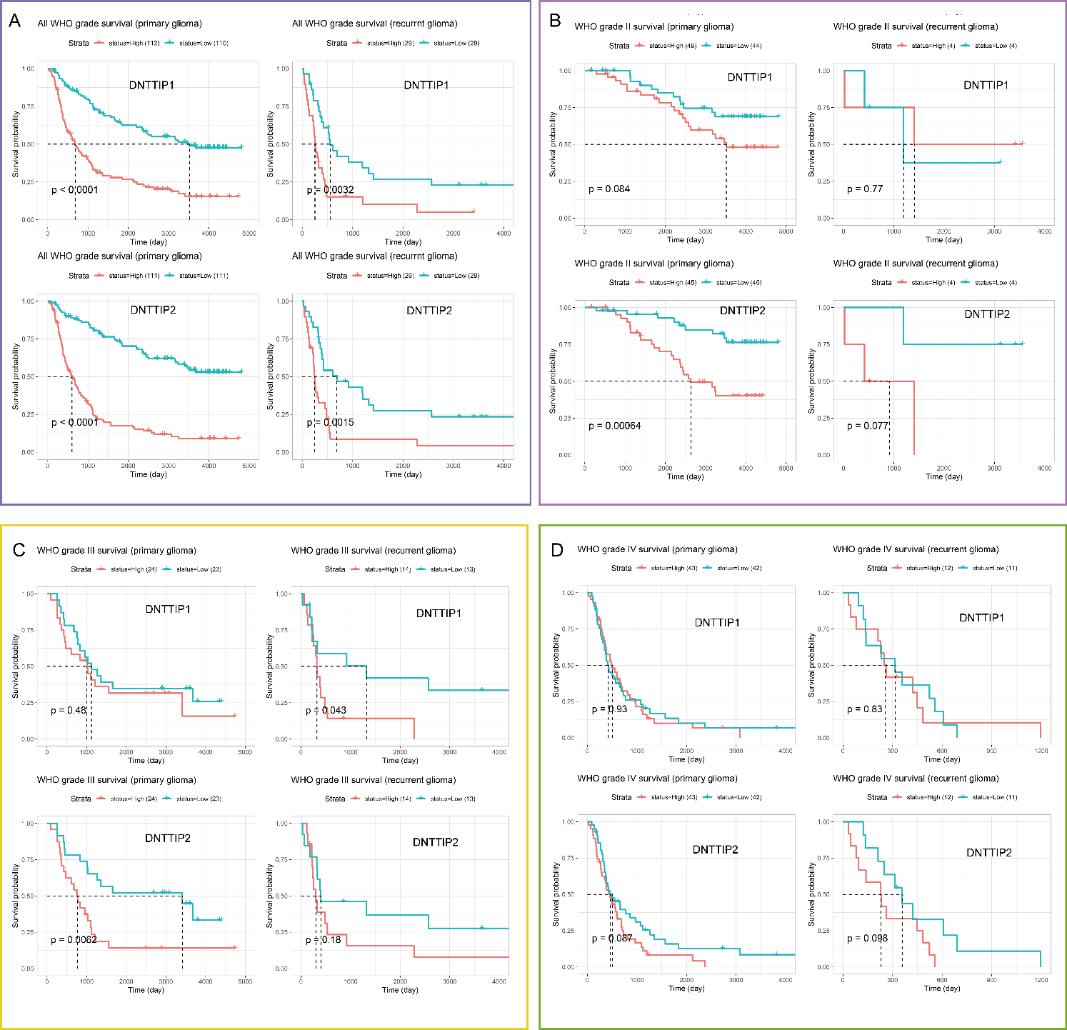


**Figure S3.** Kaplan-Meier survival curves to analyze relationships between DNTTIP1/2 expression and patient outcomes from data from Chinese Glioma Genome Atlas (CGGA).


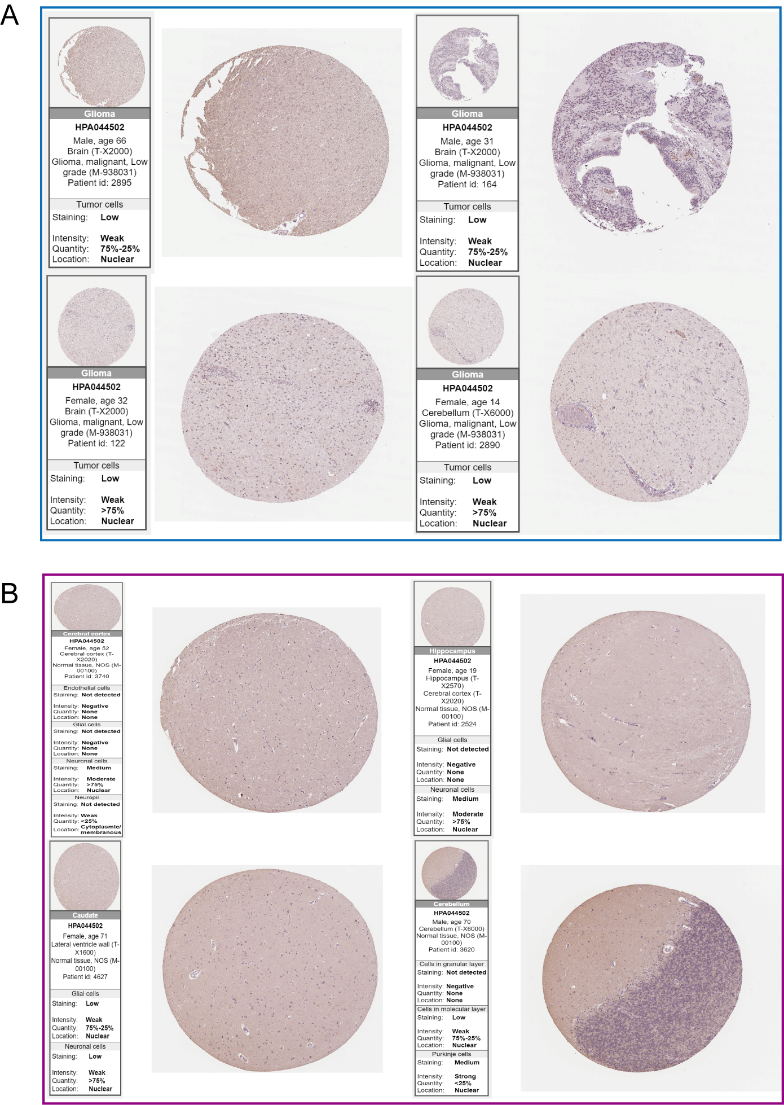
(A) Kaplan-Meier survival curves were plotted based on DNTTIP1/2 expression in the primary or recurrent glioma in CGGA dataset. (A): All WHO grades survival; (B): Grade II survival; (C) Grade III survival; (D): Grade IV survival.

**Figure S4.** Immunohistochemical staining of DNTTIP2 in LGG and normal brain tissue based on Human Protein Atlas data.


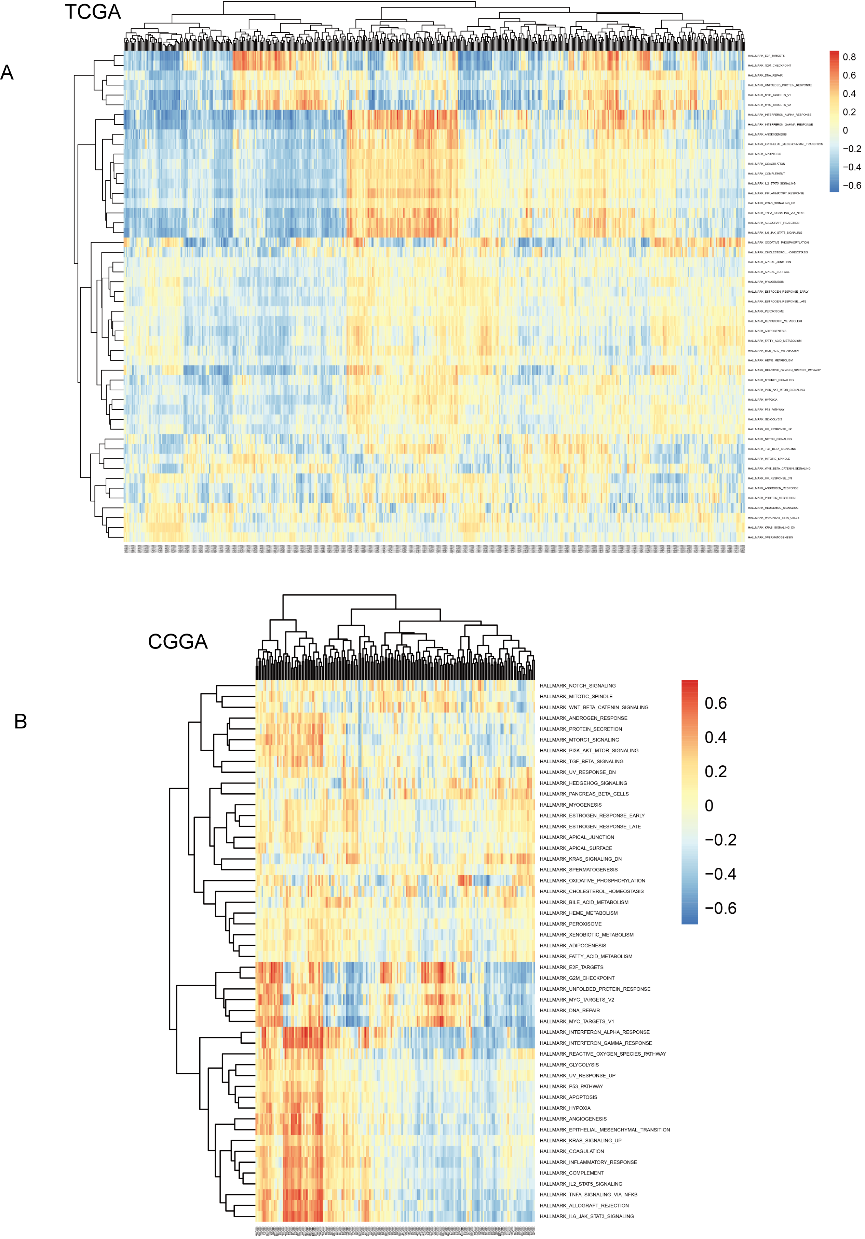
(A) DNTTIP2 protein expression in LGG was determined using the Human Protein Atlas database. (B) Data from the Human Protein Atlas data demonstrated that DNTTIP2 protein were not detected or low expressed in normal brain tissues.

**Figure S5.** The differentially enriched genesets correlated with *DNTTIP2* expression were studied through the Gene Set Variation Analysis (GSVA) algorithm.

(A, B) Heatmap displaying the hierarchical clustering of enrichment scores obtained through GSVA based on the enrichment degree profile of the datasets. A: TCGA; B: CCGA


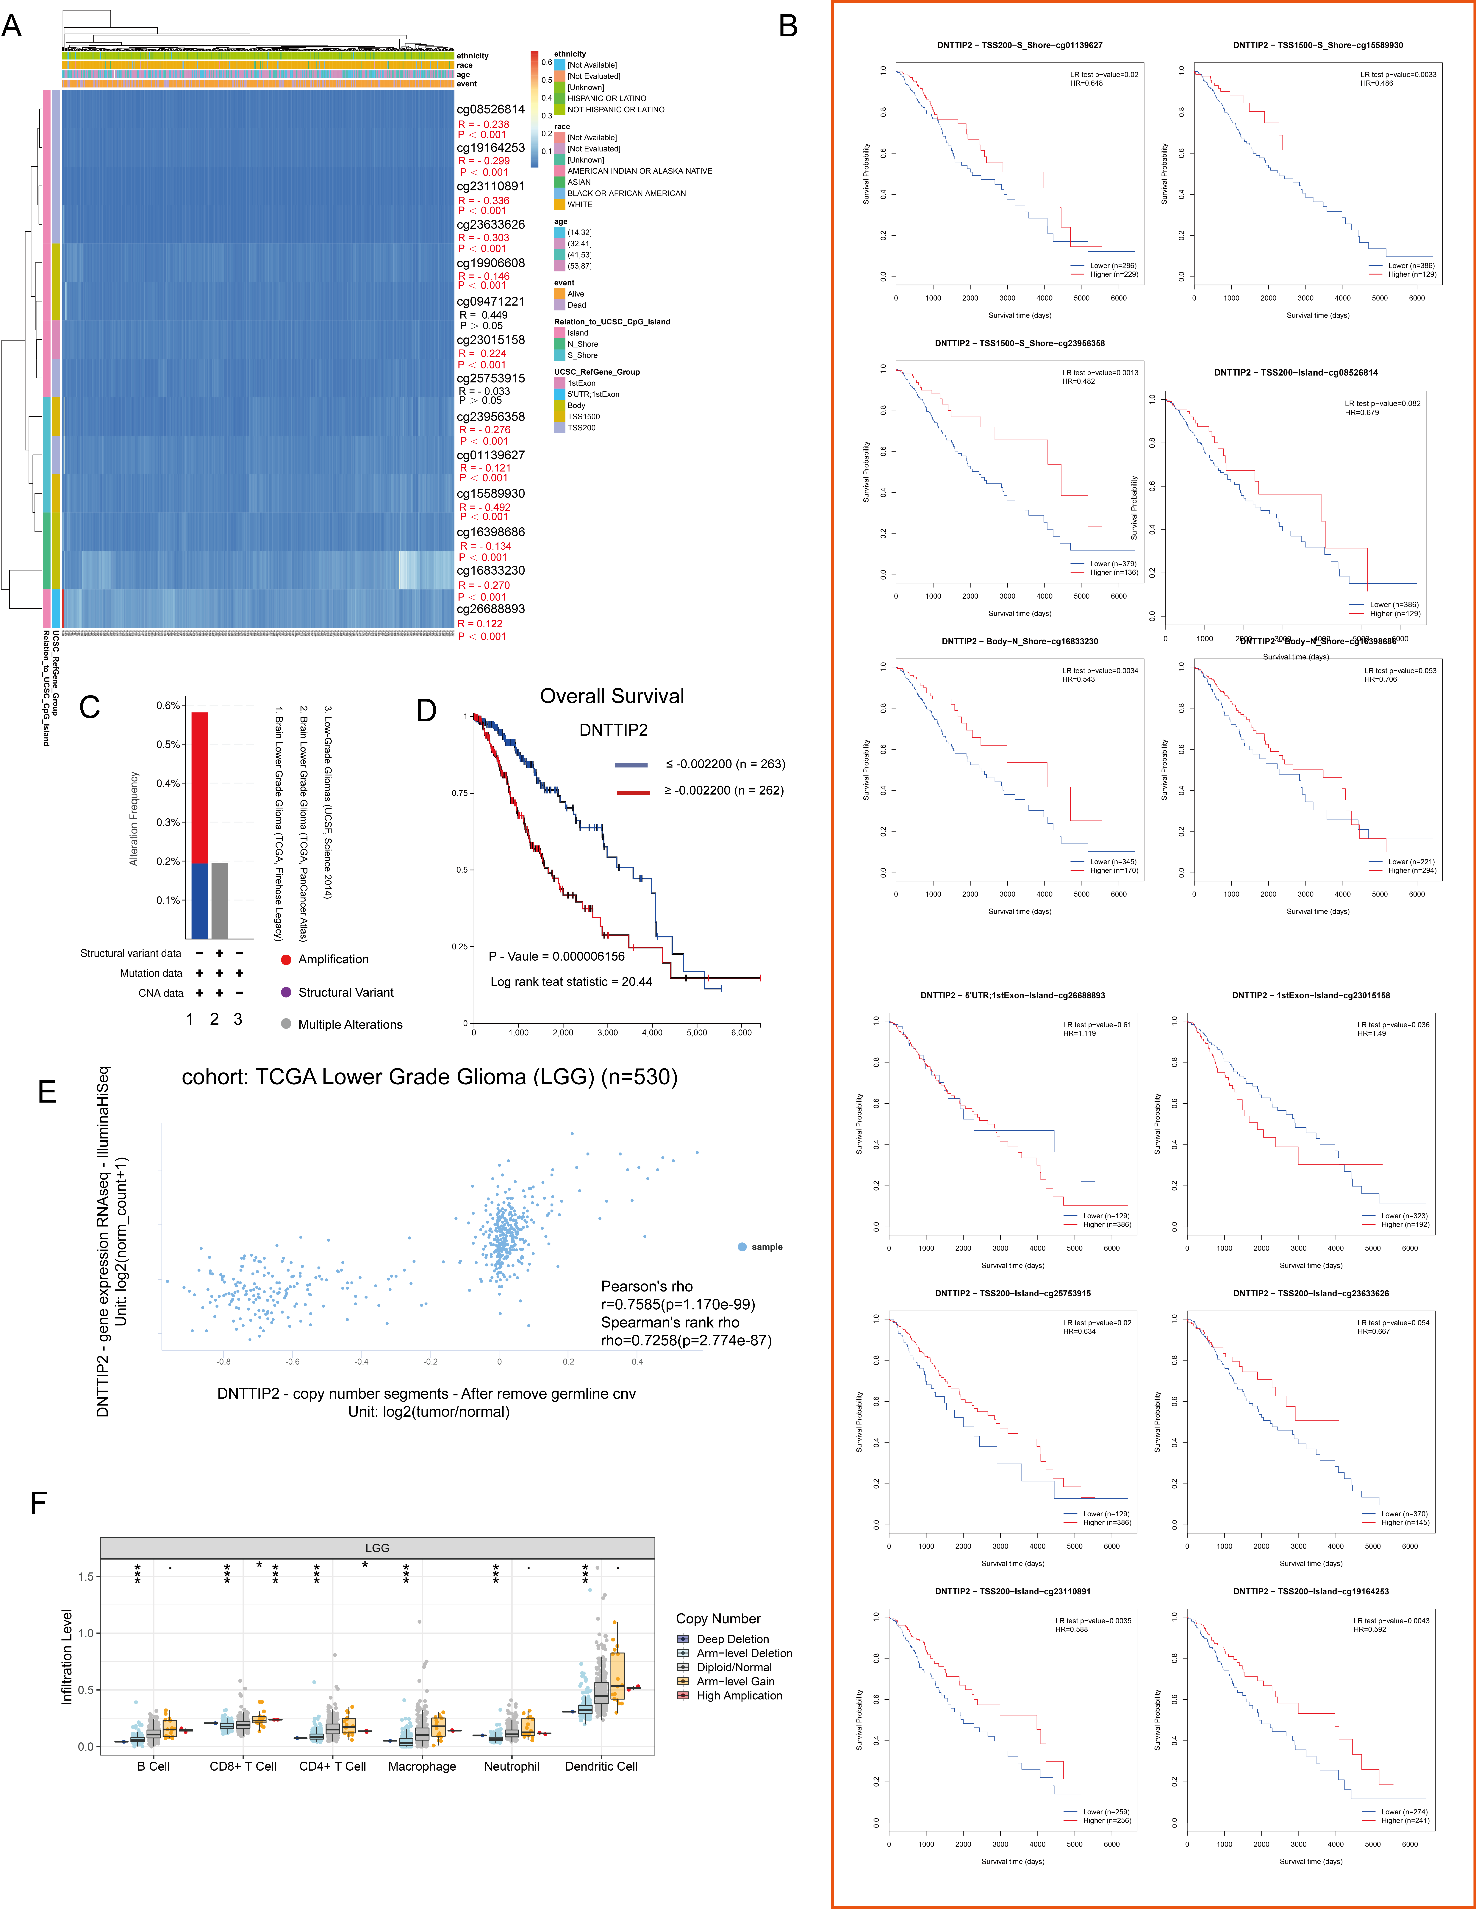


**Figure S6.** Analysis of *DNTTIP2* methylation in LGG.

(A) Waterfall plot of *DNTTIP2* methylation. The correlations between DNTTIP1/2 methylation and expression levels were also analyzed. (B) Survival analysis for all methylation probes; P < 0.05 was considered statistically significant. (C) Frequencies of *DNTTIP 2* mutations and copy number variations (CNV) in the three datasets. (D) Kaplan–Meier plots comparing Overall Survival (OS) in cases with and without *DNTTIP2* changes. (E) Scatter plots of the correlation between gene expression and copy number. The copy number state of each segment is represented by equal-sized blue dots in each sample. (F) Association between copy-number variation in *DNTTIP2* expression and infiltrating immune cells. (*****P < 0.05, *******P < 0.001).

# References

1. National Research Council Committee for the Update of the Guide for the, C. and A. Use of Laboratory, *The National Academies Collection: Reports funded by National Institutes of Health*, in *Guide for the Care and Use of Laboratory Animals*. 2011, National Academies Press (US)

Copyright © 2011, National Academy of Sciences.: Washington (DC).

2. Chanput, W., J.J. Mes, and H.J. Wichers, *THP-1 cell line: an in vitro cell model for immune modulation approach.* Int Immunopharmacol, 2014. **23**(1): p. 37-45.

3. Genin, M., et al., *M1 and M2 macrophages derived from THP-1 cells differentially modulate the response of cancer cells to etoposide.* BMC Cancer, 2015. **15**: p. 577.

4. Daigneault, M., et al., *The identification of markers of macrophage differentiation in PMA-stimulated THP-1 cells and monocyte-derived macrophages.* PLoS One, 2010. **5**(1): p. e8668.
